# Supplementary material for: Evaluation of Inter-Observer Reliability of Animal Welfare Indicators: Which Is the Best Index to Use?
Source: MDPI journal article supplement (doi:10.3390/ani11051445), 2021-05-18
Supplement: s1 [file s1]

**Table S1.** Agreement table, observer agreement chart, agreement indexes and relative confidence intervals for the selected nine dairy goat farms.

Values of the agreement indexes used with relative confidence intervals, calculated with the closed formulas of variance estimates found in published literature and through the bootstrap and exact bootstrap methods. The first column shows the agreement table [63] and the observer agreement chart [36].

<sup>1</sup>  $\pi = \pi$  index [19];  $k = k$  index [5];  $k_c =$  correct  $k$  index [5];  $k_{PABAK}$  and related indexes ( $\sigma$  index [20], G index [27] and S index [28]);  $H = H$  index [29];  $\alpha = \alpha$  index [30];  $\Gamma = \Gamma$  index [31];  $J = J$  index [32];  $B = B$  index [33];  $\Delta = \Delta$  index [24];  $\gamma(AC_1) = \gamma(AC_1)$  index [21].

<sup>2</sup> E-IT1, I-IT1, I-IT2, I-IT3, I-IT4, I-IT5, I-IT6, I-IT7, I-PT1 = farms.

<sup>3</sup>  $P_o$  = concordance rate.

<sup>4</sup> N.C. = not calculated as the closed formula or the algorithm was not able to give any value.

|                                                                                                                                                                                                                                                                                                                                                                                                                                                                                                                                          |                             |                                                               |                                                 |  | Index <sup>1</sup> | Value                       | Confidence intervals |                                                                         |    |  |  |   |   |  |    |   |    |    |    |   |   |   |    |  |  |    |    |    |                |  |  |  |
|------------------------------------------------------------------------------------------------------------------------------------------------------------------------------------------------------------------------------------------------------------------------------------------------------------------------------------------------------------------------------------------------------------------------------------------------------------------------------------------------------------------------------------------|-----------------------------|---------------------------------------------------------------|-------------------------------------------------|--|--------------------|-----------------------------|----------------------|-------------------------------------------------------------------------|----|--|--|---|---|--|----|---|----|----|----|---|---|---|----|--|--|----|----|----|----------------|--|--|--|
|                                                                                                                                                                                                                                                                                                                                                                                                                                                                                                                                          |                             |                                                               |                                                 |  |                    |                             | By closed formula    | By bootstrap method (BM; mean)<br>By exact bootstrap method (EBM; mean) |    |  |  |   |   |  |    |   |    |    |    |   |   |   |    |  |  |    |    |    |                |  |  |  |
| <div>E-IT1<sup>2</sup></div> <div><table><tr><td colspan="2"></td><td colspan="2">A2</td><td></td></tr><tr><td colspan="2"></td><td>0</td><td>1</td><td></td></tr><tr><td rowspan="2">A1</td><td>0</td><td>54</td><td>13</td><td>67</td></tr><tr><td>1</td><td>6</td><td>4</td><td>10</td></tr><tr><td colspan="2"></td><td>60</td><td>17</td><td>77</td></tr></table></div> <div>Agreement table</div> <div>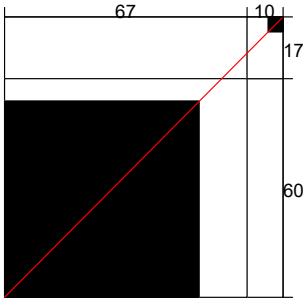</div> <div>Observer agreement chart</div> |                             |                                                               |                                                 |  |                    |                             | A2                   |                                                                         |    |  |  | 0 | 1 |  | A1 | 0 | 54 | 13 | 67 | 1 | 6 | 4 | 10 |  |  | 60 | 17 | 77 | $P_o = 0.75^3$ |  |  |  |
|                                                                                                                                                                                                                                                                                                                                                                                                                                                                                                                                          |                             |                                                               |                                                 |  |                    |                             | A2                   |                                                                         |    |  |  |   |   |  |    |   |    |    |    |   |   |   |    |  |  |    |    |    |                |  |  |  |
|                                                                                                                                                                                                                                                                                                                                                                                                                                                                                                                                          |                             |                                                               |                                                 |  |                    |                             | 0                    | 1                                                                       |    |  |  |   |   |  |    |   |    |    |    |   |   |   |    |  |  |    |    |    |                |  |  |  |
|                                                                                                                                                                                                                                                                                                                                                                                                                                                                                                                                          |                             |                                                               |                                                 |  | A1                 | 0                           | 54                   | 13                                                                      | 67 |  |  |   |   |  |    |   |    |    |    |   |   |   |    |  |  |    |    |    |                |  |  |  |
|                                                                                                                                                                                                                                                                                                                                                                                                                                                                                                                                          |                             |                                                               |                                                 |  |                    | 1                           | 6                    | 4                                                                       | 10 |  |  |   |   |  |    |   |    |    |    |   |   |   |    |  |  |    |    |    |                |  |  |  |
|                                                                                                                                                                                                                                                                                                                                                                                                                                                                                                                                          |                             |                                                               |                                                 |  |                    |                             | 60                   | 17                                                                      | 77 |  |  |   |   |  |    |   |    |    |    |   |   |   |    |  |  |    |    |    |                |  |  |  |
|                                                                                                                                                                                                                                                                                                                                                                                                                                                                                                                                          |                             |                                                               |                                                 |  | $\pi$              | 0.15<br>(with paradoxes)    | -0.19; 0.48<br>[19]  | BM: -0.12; 0.42 (0.13)<br>EBM: -0.11; 0.39 (0.14)                       |    |  |  |   |   |  |    |   |    |    |    |   |   |   |    |  |  |    |    |    |                |  |  |  |
|                                                                                                                                                                                                                                                                                                                                                                                                                                                                                                                                          |                             |                                                               |                                                 |  | $k$<br>$\alpha$    | 0.16<br>(with paradoxes)    | -0.01; 0.33<br>[62]  | BM: -0.08; 0.40 (0.14)<br>EBM: -0.08; 0.41 (0.15)                       |    |  |  |   |   |  |    |   |    |    |    |   |   |   |    |  |  |    |    |    |                |  |  |  |
|                                                                                                                                                                                                                                                                                                                                                                                                                                                                                                                                          |                             |                                                               |                                                 |  | $k_c$              | 0.23<br>(with paradoxes)    | 0.01; 0.45<br>[62]   | BM: -0.14; 0.62 (0.21)<br>EBM: -0.13; 0.60 (0.22)                       |    |  |  |   |   |  |    |   |    |    |    |   |   |   |    |  |  |    |    |    |                |  |  |  |
|                                                                                                                                                                                                                                                                                                                                                                                                                                                                                                                                          |                             |                                                               |                                                 |  | $k_{PABAK}$        | 0.51<br>(without paradoxes) | 0.31; 0.69<br>[19]   | BM: 0.30; 0.69 (0.50)<br>EBM: 0.30; 0.69 (0.51)                         |    |  |  |   |   |  |    |   |    |    |    |   |   |   |    |  |  |    |    |    |                |  |  |  |
| $H$                                                                                                                                                                                                                                                                                                                                                                                                                                                                                                                                      | 0.75<br>(without paradoxes) | 0.65; 0.85<br>[19]                                            | BM: 0.65; 0.85 (0.75)<br>EBM: 0.65; 0.84 (0.75) |  |                    |                             |                      |                                                                         |    |  |  |   |   |  |    |   |    |    |    |   |   |   |    |  |  |    |    |    |                |  |  |  |
| $\Gamma$<br>$J$                                                                                                                                                                                                                                                                                                                                                                                                                                                                                                                          | 0.25<br>(with paradoxes)    | 0.22; 0.29<br>[59]                                            | BM: 0.09; 0.47 (0.26)<br>EBM: 0.09; 0.47 (0.27) |  |                    |                             |                      |                                                                         |    |  |  |   |   |  |    |   |    |    |    |   |   |   |    |  |  |    |    |    |                |  |  |  |
| $B$                                                                                                                                                                                                                                                                                                                                                                                                                                                                                                                                      | 0.70<br>(without paradoxes) | N.C. <sup>4</sup>                                             | BM: 0.57; 0.82 (0.70)<br>EBM: 0.57; 0.82 (0.70) |  |                    |                             |                      |                                                                         |    |  |  |   |   |  |    |   |    |    |    |   |   |   |    |  |  |    |    |    |                |  |  |  |
| $\Delta$                                                                                                                                                                                                                                                                                                                                                                                                                                                                                                                                 | 0.52<br>(without paradoxes) | $\Delta_I = 0.33; 0.71$<br>$\Delta_{II} = 0.35; 0.69$<br>[24] | BM: 0.33; 0.72 (0.52)<br>EBM: 0.33; 0.72 (0.53) |  |                    |                             |                      |                                                                         |    |  |  |   |   |  |    |   |    |    |    |   |   |   |    |  |  |    |    |    |                |  |  |  |
| $\gamma (AC_1)$                                                                                                                                                                                                                                                                                                                                                                                                                                                                                                                          | 0.65<br>(without paradoxes) | 0.54; 0.77<br>[21]                                            | BM: 0.46; 0.80 (0.64)<br>EBM: 0.47; 0.80 (0.65) |  |                    |                             |                      |                                                                         |    |  |  |   |   |  |    |   |    |    |    |   |   |   |    |  |  |    |    |    |                |  |  |  |
| <div>I-IT1</div> <div><table><tr><td colspan="2"></td><td colspan="2">A2</td><td></td></tr><tr><td colspan="2"></td><td>0</td><td>1</td><td></td></tr><tr><td rowspan="2">A1</td><td>0</td><td>31</td><td>5</td><td>36</td></tr><tr><td>1</td><td>5</td><td>3</td><td>8</td></tr><tr><td colspan="2"></td><td>36</td><td>8</td><td>44</td></tr></table></div> <div>Agreement table</div> <div></div> <div>Observer agreement chart</div>              |                             |                                                               |                                                 |  |                    |                             | A2                   |                                                                         |    |  |  | 0 | 1 |  | A1 | 0 | 31 | 5  | 36 | 1 | 5 | 3 | 8  |  |  | 36 | 8  | 44 | $P_o = 0.77$   |  |  |  |
|                                                                                                                                                                                                                                                                                                                                                                                                                                                                                                                                          |                             |                                                               |                                                 |  |                    |                             | A2                   |                                                                         |    |  |  |   |   |  |    |   |    |    |    |   |   |   |    |  |  |    |    |    |                |  |  |  |
|                                                                                                                                                                                                                                                                                                                                                                                                                                                                                                                                          |                             |                                                               |                                                 |  |                    |                             | 0                    | 1                                                                       |    |  |  |   |   |  |    |   |    |    |    |   |   |   |    |  |  |    |    |    |                |  |  |  |
|                                                                                                                                                                                                                                                                                                                                                                                                                                                                                                                                          |                             |                                                               |                                                 |  | A1                 | 0                           | 31                   | 5                                                                       | 36 |  |  |   |   |  |    |   |    |    |    |   |   |   |    |  |  |    |    |    |                |  |  |  |
|                                                                                                                                                                                                                                                                                                                                                                                                                                                                                                                                          |                             |                                                               |                                                 |  |                    | 1                           | 5                    | 3                                                                       | 8  |  |  |   |   |  |    |   |    |    |    |   |   |   |    |  |  |    |    |    |                |  |  |  |
|                                                                                                                                                                                                                                                                                                                                                                                                                                                                                                                                          |                             |                                                               |                                                 |  |                    |                             | 36                   | 8                                                                       | 44 |  |  |   |   |  |    |   |    |    |    |   |   |   |    |  |  |    |    |    |                |  |  |  |
|                                                                                                                                                                                                                                                                                                                                                                                                                                                                                                                                          |                             |                                                               |                                                 |  | $\pi$              | 0.24<br>(with paradoxes)    | -0.18; 0.65<br>[19]  | BM: -0.17; 0.70 (0.24)<br>EBM: -0.14; 0.56 (0.22)                       |    |  |  |   |   |  |    |   |    |    |    |   |   |   |    |  |  |    |    |    |                |  |  |  |
|                                                                                                                                                                                                                                                                                                                                                                                                                                                                                                                                          |                             |                                                               |                                                 |  | $k$<br>$\alpha$    | 0.24<br>(with paradoxes)    | -0.18; 0.65<br>[62]  | BM: -0.15; 0.65 (0.24)<br>EBM: -0.12; 0.56 (0.23)                       |    |  |  |   |   |  |    |   |    |    |    |   |   |   |    |  |  |    |    |    |                |  |  |  |
|                                                                                                                                                                                                                                                                                                                                                                                                                                                                                                                                          |                             |                                                               |                                                 |  | $k_c$              | 0.24<br>(with paradoxes)    | 0.24; 0.24<br>[62]   | BM: -0.26; 0.74 (0.29)<br>EBM: -0.22; 0.86 (0.33)                       |    |  |  |   |   |  |    |   |    |    |    |   |   |   |    |  |  |    |    |    |                |  |  |  |
|                                                                                                                                                                                                                                                                                                                                                                                                                                                                                                                                          |                             |                                                               |                                                 |  | $k_{PABAK}$        | 0.54<br>(without paradoxes) | 0.29; 0.79<br>[19]   | BM: 0.22; 0.87 (0.55)<br>EBM: 0.27; 0.77 (0.54)                         |    |  |  |   |   |  |    |   |    |    |    |   |   |   |    |  |  |    |    |    |                |  |  |  |
| $H$                                                                                                                                                                                                                                                                                                                                                                                                                                                                                                                                      | 0.77<br>(without paradoxes) | 0.64; 0.90<br>[19]                                            | BM: 0.73; 0.97 (0.88)<br>EBM: 0.64; 0.88 (0.77) |  |                    |                             |                      |                                                                         |    |  |  |   |   |  |    |   |    |    |    |   |   |   |    |  |  |    |    |    |                |  |  |  |
| $\Gamma$<br>$J$                                                                                                                                                                                                                                                                                                                                                                                                                                                                                                                          | 0.30<br>(with paradoxes)    | 0.23; 0.36<br>[59]                                            | BM: 0.07; 0.63 (0.31)<br>EBM: 0.07; 0.60 (0.31) |  |                    |                             |                      |                                                                         |    |  |  |   |   |  |    |   |    |    |    |   |   |   |    |  |  |    |    |    |                |  |  |  |
| $B$                                                                                                                                                                                                                                                                                                                                                                                                                                                                                                                                      | 0.71<br>(without paradoxes) | N.C.                                                          | BM: 0.46; 0.91 (0.72)<br>EBM: 0.54; 0.87 (0.71) |  |                    |                             |                      |                                                                         |    |  |  |   |   |  |    |   |    |    |    |   |   |   |    |  |  |    |    |    |                |  |  |  |
| $\Delta$                                                                                                                                                                                                                                                                                                                                                                                                                                                                                                                                 | 0.54<br>(without paradoxes) | $\Delta_I = 0.30; 0.79$<br>$\Delta_{II} = 0.32; 0.77$<br>[24] | BM: 0.28; 0.83 (0.56)<br>EBM: 0.30; 0.79 (0.57) |  |                    |                             |                      |                                                                         |    |  |  |   |   |  |    |   |    |    |    |   |   |   |    |  |  |    |    |    |                |  |  |  |
| $\gamma (AC_1)$                                                                                                                                                                                                                                                                                                                                                                                                                                                                                                                          | 0.68<br>(without paradoxes) | 0.56; 0.79<br>[21]                                            | BM: 0.33; 0.90 (0.68)<br>EBM: 0.44; 0.86 (0.67) |  |                    |                             |                      |                                                                         |    |  |  |   |   |  |    |   |    |    |    |   |   |   |    |  |  |    |    |    |                |  |  |  |

I-IT2

|    |   |    |    |
|----|---|----|----|
|    |   | A2 |    |
|    |   | 0  | 1  |
| A1 | 0 | 30 | 1  |
|    | 1 | 3  | 1  |
|    |   | 33 | 2  |
|    |   |    | 35 |

Agreement table

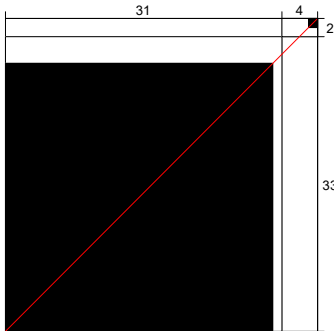

Observer agreement chart

$P_o = 0.88$

|                 |                             |                                                               |                                                   |
|-----------------|-----------------------------|---------------------------------------------------------------|---------------------------------------------------|
| $\pi$           | 0.27<br>(with paradoxes)    | -0.41; 0.95<br>[19]                                           | BM: -0.12; 0.86 (0.26)<br>EBM: -0.11; 0.78 (0.23) |
| $k$<br>$\alpha$ | 0.27<br>(with paradoxes)    | -0.40; 0.95<br>[62]                                           | BM: -0.10; 0.78 (0.27)<br>EBM: -0.09; 0.78 (0.25) |
| $k_C$           | 0.43<br>(with paradoxes)    | -0.05; 0.92<br>[62]                                           | BM: -0.17; 1.00<br>EBM: N.C. <sup>2</sup>         |
| $k_{PABAK}$     | 0.77<br>(without paradoxes) | 0.54; 0.98<br>[19]                                            | BM: 0.45; 0.95 (0.76)<br>EBM: 0.54; 0.94 (0.77)   |
| $H$             | 0.88<br>(without paradoxes) | 0.77; 0.99<br>[19]                                            | BM: 0.74; 0.99 (0.88)<br>EBM: 0.77; 0.97 (0.89)   |
| $\Gamma$<br>$J$ | 0.59<br>(with paradoxes)    | 0.52; 0.67<br>[59]                                            | BM: 0.28; 0.90 (0.59)<br>EBM: 0.29; 0.89 (0.61)   |
| $B$             | 0.87<br>(without paradoxes) | N.C.                                                          | BM: 0.73; 0.97 (0.87)<br>EBM: 0.74; 0.97 (0.87)   |
| $\Delta$        | 0.79<br>(without paradoxes) | $\Delta_I = 0.58; 0.99$<br>$\Delta_{II} = 0.62; 0.96$<br>[24] | BM: 0.52; 0.97 (0.79)<br>EBM: 0.57; 0.97 (0.81)   |
| $\gamma (AC_1)$ | 0.86<br>(without paradoxes) | 0.75; 0.98<br>[21]                                            | BM: 0.66; 0.99 (0.86)<br>EBM: 0.70; 0.97 (0.86)   |

I-IT3

|    |   |    |    |
|----|---|----|----|
|    |   | 2  |    |
|    |   | 0  | 1  |
| A1 | 0 | 42 | 2  |
|    | 1 | 2  | 3  |
|    |   | 44 | 5  |
|    |   |    | 49 |

Agreement table



Observer agreement chart

$P_o = 0.92$

|                 |                             |                                                               |                                                   |
|-----------------|-----------------------------|---------------------------------------------------------------|---------------------------------------------------|
| $\pi$           | 0.55<br>(with paradoxes)    | 0.13; 0.98<br>[19]                                            | BM: 0.17; 0.83 (0.54)<br>EBM: - 0.04; 0.90 (0.52) |
| $k$<br>$\alpha$ | 0.55<br>(with paradoxes)    | 0.14; 0.97<br>[62]                                            | BM: 0.21; 0.83 (0.55)<br>EBM: - 0.03; 0.90 (0.53) |
| $k_C$           | 0.55<br>(with paradoxes)    | 0.55; 0.55<br>[62]                                            | BM: 0.20; 1.00 (0.64)<br>EBM: -1.29; 5.09 (1.23)  |
| $k_{PABAK}$     | 0.84<br>(without paradoxes) | 0.69; 0.99<br>[19]                                            | BM: 0.71; 0.95 (0.84)<br>EBM: 0.67; 0.96 (0.84)   |
| $H$             | 0.92<br>(without paradoxes) | 0.84; 0.99<br>[19]                                            | BM: 0.86; 0.97 (0.92)<br>EBM: 0.80; 0.97 (0.90)   |
| $\Gamma$<br>$J$ | 0.69<br>(with paradoxes)    | 0.64; 0.76<br>[59]                                            | BM: 0.51; 0.90 (0.71)<br>EBM: 0.45; 0.92 (0.70)   |
| $B$             | 0.90<br>(without paradoxes) | N.C.                                                          | BM: 0.85; 0.98 (0.90)<br>EBM: 0.80; 0.98 (0.90)   |
| $\Delta$        | 0.84<br>(without paradoxes) | $\Delta_I = 0.68; 0.99$<br>$\Delta_{II} = 0.70; 0.98$<br>[24] | BM: 0.72; 0.97 (0.85)<br>EBM: 0.68; 0.98 (0.85)   |
| $\gamma (AC_1)$ | 0.90<br>(without paradoxes) | 0.78; 1.02<br>[21]                                            | BM: 0.81; 0.97(0.90)<br>EBM: 0.78; 0.98 (0.90)    |

|                                                                                                                                                                                                                                                                                                                                   |                             |                                                               |                                                   |    |              |  |    |  |  |  |  |   |   |  |    |   |    |   |    |   |   |   |   |  |  |    |   |    |                                                                                                                                                                                                                                                                                                                                                                                                                                                                                                                                                                                                                                                                                                                                                                                                                                                                                                                                                                                                                                                                                                                                                                                                                                                                                                                                                                                                                                                                                                                            |  |  |  |       |                           |                     |                                                   |            |                          |                     |                                    |       |                          |                    |                             |             |                             |                    |                                                 |     |                             |                    |                                                 |                 |                          |                    |                                                 |     |                             |      |                                                 |          |                             |                                                               |                                                 |                 |                             |                    |                                                 |
|-----------------------------------------------------------------------------------------------------------------------------------------------------------------------------------------------------------------------------------------------------------------------------------------------------------------------------------|-----------------------------|---------------------------------------------------------------|---------------------------------------------------|----|--------------|--|----|--|--|--|--|---|---|--|----|---|----|---|----|---|---|---|---|--|--|----|---|----|----------------------------------------------------------------------------------------------------------------------------------------------------------------------------------------------------------------------------------------------------------------------------------------------------------------------------------------------------------------------------------------------------------------------------------------------------------------------------------------------------------------------------------------------------------------------------------------------------------------------------------------------------------------------------------------------------------------------------------------------------------------------------------------------------------------------------------------------------------------------------------------------------------------------------------------------------------------------------------------------------------------------------------------------------------------------------------------------------------------------------------------------------------------------------------------------------------------------------------------------------------------------------------------------------------------------------------------------------------------------------------------------------------------------------------------------------------------------------------------------------------------------------|--|--|--|-------|---------------------------|---------------------|---------------------------------------------------|------------|--------------------------|---------------------|------------------------------------|-------|--------------------------|--------------------|-----------------------------|-------------|-----------------------------|--------------------|-------------------------------------------------|-----|-----------------------------|--------------------|-------------------------------------------------|-----------------|--------------------------|--------------------|-------------------------------------------------|-----|-----------------------------|------|-------------------------------------------------|----------|-----------------------------|---------------------------------------------------------------|-------------------------------------------------|-----------------|-----------------------------|--------------------|-------------------------------------------------|
| I-IT4                                                                                                                                                                                                                                                                                                                             |                             |                                                               |                                                   |    | $P_o = 0.95$ |  |    |  |  |  |  |   |   |  |    |   |    |   |    |   |   |   |   |  |  |    |   |    |                                                                                                                                                                                                                                                                                                                                                                                                                                                                                                                                                                                                                                                                                                                                                                                                                                                                                                                                                                                                                                                                                                                                                                                                                                                                                                                                                                                                                                                                                                                            |  |  |  |       |                           |                     |                                                   |            |                          |                     |                                    |       |                          |                    |                             |             |                             |                    |                                                 |     |                             |                    |                                                 |                 |                          |                    |                                                 |     |                             |      |                                                 |          |                             |                                                               |                                                 |                 |                             |                    |                                                 |
| <table><tr><td colspan="2"></td><td colspan="2">A2</td><td></td></tr><tr><td colspan="2"></td><td>0</td><td>1</td><td></td></tr><tr><td rowspan="2">A1</td><td>0</td><td>33</td><td>2</td><td>35</td></tr><tr><td>1</td><td>0</td><td>2</td><td>2</td></tr><tr><td colspan="2"></td><td>33</td><td>4</td><td>37</td></tr></table> |                             |                                                               |                                                   |    |              |  | A2 |  |  |  |  | 0 | 1 |  | A1 | 0 | 33 | 2 | 35 | 1 | 0 | 2 | 2 |  |  | 33 | 4 | 37 | <table><tr><td><math>\pi</math></td><td>0.64<br/>(with paradoxes)</td><td>0.14; 1.13<br/>[19]</td><td>BM: 0.19; 0.92 (0.62)<br/>EBM: - 0.04; 1.00 (0.59)</td></tr><tr><td><math>k_\alpha</math></td><td>0.64<br/>(with paradoxes)</td><td>0.16; 1.12<br/>[62]</td><td>BM: 0.23; 0.93 (0.62)<br/>EBM: N.C.</td></tr><tr><td><math>k_C</math></td><td>1<br/>(with paradoxes)</td><td>0.51; 1.48<br/>[62]</td><td>BM: N.C.<br/>EBM: -4.3; 8.33</td></tr><tr><td><math>k_{PABAK}</math></td><td>0.89<br/>(without paradoxes)</td><td>0.76; 1.00<br/>[19]</td><td>BM: 0.79; 0.97 (0.89)<br/>EBM: 0.72; 1.00 (0.89)</td></tr><tr><td><math>H</math></td><td>0.95<br/>(without paradoxes)</td><td>0.88; 1.00<br/>[19]</td><td>BM: 0.88; 0.99 (0.95)<br/>EBM: 0.86; 1.00 (0.95)</td></tr><tr><td><math>\Gamma</math><br/><math>J</math></td><td>0.79<br/>(with paradoxes)</td><td>0.72; 0.87<br/>[59]</td><td>BM: 0.59; 0.95 (0.80)<br/>EBM: 0.52; 1.00 (0.79)</td></tr><tr><td><math>B</math></td><td>0.94<br/>(without paradoxes)</td><td>N.C.</td><td>BM: 0.88; 0.99 (0.94)<br/>EBM: 0.85; 1.00 (0.94)</td></tr><tr><td><math>\Delta</math></td><td>0.95<br/>(without paradoxes)</td><td><math>\Delta_I = 0.84; 1.05</math><br/><math>\Delta_{II} = 0.84; 1.05</math><br/>[24]</td><td>BM: 0.87; 0.99 (0.94)<br/>EBM: 0.86; 1.00 (0.95)</td></tr><tr><td><math>\gamma (AC_1)</math></td><td>0.94<br/>(without paradoxes)</td><td>0.82; 1.05<br/>[21]</td><td>BM: 0.86; 0.99 (0.93)<br/>EBM: 0.83; 1.00 (0.93)</td></tr></table> |  |  |  | $\pi$ | 0.64<br>(with paradoxes)  | 0.14; 1.13<br>[19]  | BM: 0.19; 0.92 (0.62)<br>EBM: - 0.04; 1.00 (0.59) | $k_\alpha$ | 0.64<br>(with paradoxes) | 0.16; 1.12<br>[62]  | BM: 0.23; 0.93 (0.62)<br>EBM: N.C. | $k_C$ | 1<br>(with paradoxes)    | 0.51; 1.48<br>[62] | BM: N.C.<br>EBM: -4.3; 8.33 | $k_{PABAK}$ | 0.89<br>(without paradoxes) | 0.76; 1.00<br>[19] | BM: 0.79; 0.97 (0.89)<br>EBM: 0.72; 1.00 (0.89) | $H$ | 0.95<br>(without paradoxes) | 0.88; 1.00<br>[19] | BM: 0.88; 0.99 (0.95)<br>EBM: 0.86; 1.00 (0.95) | $\Gamma$<br>$J$ | 0.79<br>(with paradoxes) | 0.72; 0.87<br>[59] | BM: 0.59; 0.95 (0.80)<br>EBM: 0.52; 1.00 (0.79) | $B$ | 0.94<br>(without paradoxes) | N.C. | BM: 0.88; 0.99 (0.94)<br>EBM: 0.85; 1.00 (0.94) | $\Delta$ | 0.95<br>(without paradoxes) | $\Delta_I = 0.84; 1.05$<br>$\Delta_{II} = 0.84; 1.05$<br>[24] | BM: 0.87; 0.99 (0.94)<br>EBM: 0.86; 1.00 (0.95) | $\gamma (AC_1)$ | 0.94<br>(without paradoxes) | 0.82; 1.05<br>[21] | BM: 0.86; 0.99 (0.93)<br>EBM: 0.83; 1.00 (0.93) |
|                                                                                                                                                                                                                                                                                                                                   |                             | A2                                                            |                                                   |    |              |  |    |  |  |  |  |   |   |  |    |   |    |   |    |   |   |   |   |  |  |    |   |    |                                                                                                                                                                                                                                                                                                                                                                                                                                                                                                                                                                                                                                                                                                                                                                                                                                                                                                                                                                                                                                                                                                                                                                                                                                                                                                                                                                                                                                                                                                                            |  |  |  |       |                           |                     |                                                   |            |                          |                     |                                    |       |                          |                    |                             |             |                             |                    |                                                 |     |                             |                    |                                                 |                 |                          |                    |                                                 |     |                             |      |                                                 |          |                             |                                                               |                                                 |                 |                             |                    |                                                 |
|                                                                                                                                                                                                                                                                                                                                   |                             | 0                                                             | 1                                                 |    |              |  |    |  |  |  |  |   |   |  |    |   |    |   |    |   |   |   |   |  |  |    |   |    |                                                                                                                                                                                                                                                                                                                                                                                                                                                                                                                                                                                                                                                                                                                                                                                                                                                                                                                                                                                                                                                                                                                                                                                                                                                                                                                                                                                                                                                                                                                            |  |  |  |       |                           |                     |                                                   |            |                          |                     |                                    |       |                          |                    |                             |             |                             |                    |                                                 |     |                             |                    |                                                 |                 |                          |                    |                                                 |     |                             |      |                                                 |          |                             |                                                               |                                                 |                 |                             |                    |                                                 |
| A1                                                                                                                                                                                                                                                                                                                                | 0                           | 33                                                            | 2                                                 | 35 |              |  |    |  |  |  |  |   |   |  |    |   |    |   |    |   |   |   |   |  |  |    |   |    |                                                                                                                                                                                                                                                                                                                                                                                                                                                                                                                                                                                                                                                                                                                                                                                                                                                                                                                                                                                                                                                                                                                                                                                                                                                                                                                                                                                                                                                                                                                            |  |  |  |       |                           |                     |                                                   |            |                          |                     |                                    |       |                          |                    |                             |             |                             |                    |                                                 |     |                             |                    |                                                 |                 |                          |                    |                                                 |     |                             |      |                                                 |          |                             |                                                               |                                                 |                 |                             |                    |                                                 |
|                                                                                                                                                                                                                                                                                                                                   | 1                           | 0                                                             | 2                                                 | 2  |              |  |    |  |  |  |  |   |   |  |    |   |    |   |    |   |   |   |   |  |  |    |   |    |                                                                                                                                                                                                                                                                                                                                                                                                                                                                                                                                                                                                                                                                                                                                                                                                                                                                                                                                                                                                                                                                                                                                                                                                                                                                                                                                                                                                                                                                                                                            |  |  |  |       |                           |                     |                                                   |            |                          |                     |                                    |       |                          |                    |                             |             |                             |                    |                                                 |     |                             |                    |                                                 |                 |                          |                    |                                                 |     |                             |      |                                                 |          |                             |                                                               |                                                 |                 |                             |                    |                                                 |
|                                                                                                                                                                                                                                                                                                                                   |                             | 33                                                            | 4                                                 | 37 |              |  |    |  |  |  |  |   |   |  |    |   |    |   |    |   |   |   |   |  |  |    |   |    |                                                                                                                                                                                                                                                                                                                                                                                                                                                                                                                                                                                                                                                                                                                                                                                                                                                                                                                                                                                                                                                                                                                                                                                                                                                                                                                                                                                                                                                                                                                            |  |  |  |       |                           |                     |                                                   |            |                          |                     |                                    |       |                          |                    |                             |             |                             |                    |                                                 |     |                             |                    |                                                 |                 |                          |                    |                                                 |     |                             |      |                                                 |          |                             |                                                               |                                                 |                 |                             |                    |                                                 |
| $\pi$                                                                                                                                                                                                                                                                                                                             | 0.64<br>(with paradoxes)    | 0.14; 1.13<br>[19]                                            | BM: 0.19; 0.92 (0.62)<br>EBM: - 0.04; 1.00 (0.59) |    |              |  |    |  |  |  |  |   |   |  |    |   |    |   |    |   |   |   |   |  |  |    |   |    |                                                                                                                                                                                                                                                                                                                                                                                                                                                                                                                                                                                                                                                                                                                                                                                                                                                                                                                                                                                                                                                                                                                                                                                                                                                                                                                                                                                                                                                                                                                            |  |  |  |       |                           |                     |                                                   |            |                          |                     |                                    |       |                          |                    |                             |             |                             |                    |                                                 |     |                             |                    |                                                 |                 |                          |                    |                                                 |     |                             |      |                                                 |          |                             |                                                               |                                                 |                 |                             |                    |                                                 |
| $k_\alpha$                                                                                                                                                                                                                                                                                                                        | 0.64<br>(with paradoxes)    | 0.16; 1.12<br>[62]                                            | BM: 0.23; 0.93 (0.62)<br>EBM: N.C.                |    |              |  |    |  |  |  |  |   |   |  |    |   |    |   |    |   |   |   |   |  |  |    |   |    |                                                                                                                                                                                                                                                                                                                                                                                                                                                                                                                                                                                                                                                                                                                                                                                                                                                                                                                                                                                                                                                                                                                                                                                                                                                                                                                                                                                                                                                                                                                            |  |  |  |       |                           |                     |                                                   |            |                          |                     |                                    |       |                          |                    |                             |             |                             |                    |                                                 |     |                             |                    |                                                 |                 |                          |                    |                                                 |     |                             |      |                                                 |          |                             |                                                               |                                                 |                 |                             |                    |                                                 |
| $k_C$                                                                                                                                                                                                                                                                                                                             | 1<br>(with paradoxes)       | 0.51; 1.48<br>[62]                                            | BM: N.C.<br>EBM: -4.3; 8.33                       |    |              |  |    |  |  |  |  |   |   |  |    |   |    |   |    |   |   |   |   |  |  |    |   |    |                                                                                                                                                                                                                                                                                                                                                                                                                                                                                                                                                                                                                                                                                                                                                                                                                                                                                                                                                                                                                                                                                                                                                                                                                                                                                                                                                                                                                                                                                                                            |  |  |  |       |                           |                     |                                                   |            |                          |                     |                                    |       |                          |                    |                             |             |                             |                    |                                                 |     |                             |                    |                                                 |                 |                          |                    |                                                 |     |                             |      |                                                 |          |                             |                                                               |                                                 |                 |                             |                    |                                                 |
| $k_{PABAK}$                                                                                                                                                                                                                                                                                                                       | 0.89<br>(without paradoxes) | 0.76; 1.00<br>[19]                                            | BM: 0.79; 0.97 (0.89)<br>EBM: 0.72; 1.00 (0.89)   |    |              |  |    |  |  |  |  |   |   |  |    |   |    |   |    |   |   |   |   |  |  |    |   |    |                                                                                                                                                                                                                                                                                                                                                                                                                                                                                                                                                                                                                                                                                                                                                                                                                                                                                                                                                                                                                                                                                                                                                                                                                                                                                                                                                                                                                                                                                                                            |  |  |  |       |                           |                     |                                                   |            |                          |                     |                                    |       |                          |                    |                             |             |                             |                    |                                                 |     |                             |                    |                                                 |                 |                          |                    |                                                 |     |                             |      |                                                 |          |                             |                                                               |                                                 |                 |                             |                    |                                                 |
| $H$                                                                                                                                                                                                                                                                                                                               | 0.95<br>(without paradoxes) | 0.88; 1.00<br>[19]                                            | BM: 0.88; 0.99 (0.95)<br>EBM: 0.86; 1.00 (0.95)   |    |              |  |    |  |  |  |  |   |   |  |    |   |    |   |    |   |   |   |   |  |  |    |   |    |                                                                                                                                                                                                                                                                                                                                                                                                                                                                                                                                                                                                                                                                                                                                                                                                                                                                                                                                                                                                                                                                                                                                                                                                                                                                                                                                                                                                                                                                                                                            |  |  |  |       |                           |                     |                                                   |            |                          |                     |                                    |       |                          |                    |                             |             |                             |                    |                                                 |     |                             |                    |                                                 |                 |                          |                    |                                                 |     |                             |      |                                                 |          |                             |                                                               |                                                 |                 |                             |                    |                                                 |
| $\Gamma$<br>$J$                                                                                                                                                                                                                                                                                                                   | 0.79<br>(with paradoxes)    | 0.72; 0.87<br>[59]                                            | BM: 0.59; 0.95 (0.80)<br>EBM: 0.52; 1.00 (0.79)   |    |              |  |    |  |  |  |  |   |   |  |    |   |    |   |    |   |   |   |   |  |  |    |   |    |                                                                                                                                                                                                                                                                                                                                                                                                                                                                                                                                                                                                                                                                                                                                                                                                                                                                                                                                                                                                                                                                                                                                                                                                                                                                                                                                                                                                                                                                                                                            |  |  |  |       |                           |                     |                                                   |            |                          |                     |                                    |       |                          |                    |                             |             |                             |                    |                                                 |     |                             |                    |                                                 |                 |                          |                    |                                                 |     |                             |      |                                                 |          |                             |                                                               |                                                 |                 |                             |                    |                                                 |
| $B$                                                                                                                                                                                                                                                                                                                               | 0.94<br>(without paradoxes) | N.C.                                                          | BM: 0.88; 0.99 (0.94)<br>EBM: 0.85; 1.00 (0.94)   |    |              |  |    |  |  |  |  |   |   |  |    |   |    |   |    |   |   |   |   |  |  |    |   |    |                                                                                                                                                                                                                                                                                                                                                                                                                                                                                                                                                                                                                                                                                                                                                                                                                                                                                                                                                                                                                                                                                                                                                                                                                                                                                                                                                                                                                                                                                                                            |  |  |  |       |                           |                     |                                                   |            |                          |                     |                                    |       |                          |                    |                             |             |                             |                    |                                                 |     |                             |                    |                                                 |                 |                          |                    |                                                 |     |                             |      |                                                 |          |                             |                                                               |                                                 |                 |                             |                    |                                                 |
| $\Delta$                                                                                                                                                                                                                                                                                                                          | 0.95<br>(without paradoxes) | $\Delta_I = 0.84; 1.05$<br>$\Delta_{II} = 0.84; 1.05$<br>[24] | BM: 0.87; 0.99 (0.94)<br>EBM: 0.86; 1.00 (0.95)   |    |              |  |    |  |  |  |  |   |   |  |    |   |    |   |    |   |   |   |   |  |  |    |   |    |                                                                                                                                                                                                                                                                                                                                                                                                                                                                                                                                                                                                                                                                                                                                                                                                                                                                                                                                                                                                                                                                                                                                                                                                                                                                                                                                                                                                                                                                                                                            |  |  |  |       |                           |                     |                                                   |            |                          |                     |                                    |       |                          |                    |                             |             |                             |                    |                                                 |     |                             |                    |                                                 |                 |                          |                    |                                                 |     |                             |      |                                                 |          |                             |                                                               |                                                 |                 |                             |                    |                                                 |
| $\gamma (AC_1)$                                                                                                                                                                                                                                                                                                                   | 0.94<br>(without paradoxes) | 0.82; 1.05<br>[21]                                            | BM: 0.86; 0.99 (0.93)<br>EBM: 0.83; 1.00 (0.93)   |    |              |  |    |  |  |  |  |   |   |  |    |   |    |   |    |   |   |   |   |  |  |    |   |    |                                                                                                                                                                                                                                                                                                                                                                                                                                                                                                                                                                                                                                                                                                                                                                                                                                                                                                                                                                                                                                                                                                                                                                                                                                                                                                                                                                                                                                                                                                                            |  |  |  |       |                           |                     |                                                   |            |                          |                     |                                    |       |                          |                    |                             |             |                             |                    |                                                 |     |                             |                    |                                                 |                 |                          |                    |                                                 |     |                             |      |                                                 |          |                             |                                                               |                                                 |                 |                             |                    |                                                 |
| <p>Agreement table</p> 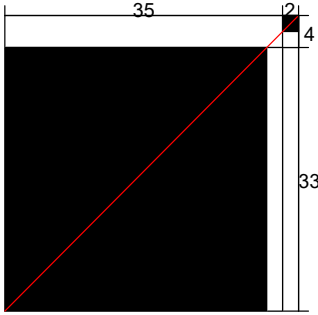 <p>Observer agreement chart</p>                                                                                                                                                                                          |                             |                                                               |                                                   |    |              |  |    |  |  |  |  |   |   |  |    |   |    |   |    |   |   |   |   |  |  |    |   |    |                                                                                                                                                                                                                                                                                                                                                                                                                                                                                                                                                                                                                                                                                                                                                                                                                                                                                                                                                                                                                                                                                                                                                                                                                                                                                                                                                                                                                                                                                                                            |  |  |  |       |                           |                     |                                                   |            |                          |                     |                                    |       |                          |                    |                             |             |                             |                    |                                                 |     |                             |                    |                                                 |                 |                          |                    |                                                 |     |                             |      |                                                 |          |                             |                                                               |                                                 |                 |                             |                    |                                                 |
| I-IT5                                                                                                                                                                                                                                                                                                                             |                             |                                                               |                                                   |    | $P_o = 0.95$ |  |    |  |  |  |  |   |   |  |    |   |    |   |    |   |   |   |   |  |  |    |   |    |                                                                                                                                                                                                                                                                                                                                                                                                                                                                                                                                                                                                                                                                                                                                                                                                                                                                                                                                                                                                                                                                                                                                                                                                                                                                                                                                                                                                                                                                                                                            |  |  |  |       |                           |                     |                                                   |            |                          |                     |                                    |       |                          |                    |                             |             |                             |                    |                                                 |     |                             |                    |                                                 |                 |                          |                    |                                                 |     |                             |      |                                                 |          |                             |                                                               |                                                 |                 |                             |                    |                                                 |
| <table><tr><td colspan="2"></td><td colspan="2">A2</td><td></td></tr><tr><td colspan="2"></td><td>0</td><td>1</td><td></td></tr><tr><td rowspan="2">A1</td><td>0</td><td>38</td><td>2</td><td>40</td></tr><tr><td>1</td><td>0</td><td>0</td><td>0</td></tr><tr><td colspan="2"></td><td>38</td><td>2</td><td>40</td></tr></table> |                             |                                                               |                                                   |    |              |  | A2 |  |  |  |  | 0 | 1 |  | A1 | 0 | 38 | 2 | 40 | 1 | 0 | 0 | 0 |  |  | 38 | 2 | 40 | <table><tr><td><math>\pi</math></td><td>-0.02<br/>(with paradoxes)</td><td>-1.43; 1.38<br/>[19]</td><td>BM: N.C.<br/>EBM: -0.07; 1.00 (0.10)</td></tr><tr><td><math>k_\alpha</math></td><td>0.00<br/>(with paradoxes)</td><td>-1.35; 1.35<br/>[62]</td><td>BM: N.C.<br/>EBM: 0.00; 1.00 (0.13)</td></tr><tr><td><math>k_C</math></td><td>0.00<br/>(with paradoxes)</td><td>N.C.</td><td>BM: N.C.<br/>EBM: N.C.</td></tr><tr><td><math>k_{PABAK}</math></td><td>0.90<br/>(without paradoxes)</td><td>0.76; 1.00<br/>[19]</td><td>BM: 0.74; 1.00 (0.90)<br/>EBM: 0.75; 1.00 (0.90)</td></tr><tr><td><math>H</math></td><td>0.95<br/>(without paradoxes)</td><td>0.88; 1.00<br/>[19]</td><td>BM: 0.86; 1.00 (0.95)<br/>EBM: 0.87; 1.00 (0.95)</td></tr><tr><td><math>\Gamma</math><br/><math>J</math></td><td>0.81<br/>(with paradoxes)</td><td>0.74; 0.88<br/>[59]</td><td>BM: 0.51; 1.00 (0.79)<br/>EBM: 0.56; 1.00 (0.81)</td></tr><tr><td><math>B</math></td><td>0.95<br/>(without paradoxes)</td><td>N.C.</td><td>BM: 0.87; 1.00 (0.95)<br/>EBM: 0.87; 1.00 (0.95)</td></tr><tr><td><math>\Delta</math></td><td>0.95<br/>(without paradoxes)</td><td>N.C.</td><td>BM: 0.90; 1.00 (0.97)<br/>EBM: 0.87; 1.00 (0.95)</td></tr><tr><td><math>\gamma (AC_1)</math></td><td>0.95<br/>(without paradoxes)</td><td>0.83; 1.00<br/>[21]</td><td>BM: 0.81; 1.00 (0.94)<br/>EBM: 0.86; 1.00 (0.95)</td></tr></table>                                                                                                               |  |  |  | $\pi$ | -0.02<br>(with paradoxes) | -1.43; 1.38<br>[19] | BM: N.C.<br>EBM: -0.07; 1.00 (0.10)               | $k_\alpha$ | 0.00<br>(with paradoxes) | -1.35; 1.35<br>[62] | BM: N.C.<br>EBM: 0.00; 1.00 (0.13) | $k_C$ | 0.00<br>(with paradoxes) | N.C.               | BM: N.C.<br>EBM: N.C.       | $k_{PABAK}$ | 0.90<br>(without paradoxes) | 0.76; 1.00<br>[19] | BM: 0.74; 1.00 (0.90)<br>EBM: 0.75; 1.00 (0.90) | $H$ | 0.95<br>(without paradoxes) | 0.88; 1.00<br>[19] | BM: 0.86; 1.00 (0.95)<br>EBM: 0.87; 1.00 (0.95) | $\Gamma$<br>$J$ | 0.81<br>(with paradoxes) | 0.74; 0.88<br>[59] | BM: 0.51; 1.00 (0.79)<br>EBM: 0.56; 1.00 (0.81) | $B$ | 0.95<br>(without paradoxes) | N.C. | BM: 0.87; 1.00 (0.95)<br>EBM: 0.87; 1.00 (0.95) | $\Delta$ | 0.95<br>(without paradoxes) | N.C.                                                          | BM: 0.90; 1.00 (0.97)<br>EBM: 0.87; 1.00 (0.95) | $\gamma (AC_1)$ | 0.95<br>(without paradoxes) | 0.83; 1.00<br>[21] | BM: 0.81; 1.00 (0.94)<br>EBM: 0.86; 1.00 (0.95) |
|                                                                                                                                                                                                                                                                                                                                   |                             | A2                                                            |                                                   |    |              |  |    |  |  |  |  |   |   |  |    |   |    |   |    |   |   |   |   |  |  |    |   |    |                                                                                                                                                                                                                                                                                                                                                                                                                                                                                                                                                                                                                                                                                                                                                                                                                                                                                                                                                                                                                                                                                                                                                                                                                                                                                                                                                                                                                                                                                                                            |  |  |  |       |                           |                     |                                                   |            |                          |                     |                                    |       |                          |                    |                             |             |                             |                    |                                                 |     |                             |                    |                                                 |                 |                          |                    |                                                 |     |                             |      |                                                 |          |                             |                                                               |                                                 |                 |                             |                    |                                                 |
|                                                                                                                                                                                                                                                                                                                                   |                             | 0                                                             | 1                                                 |    |              |  |    |  |  |  |  |   |   |  |    |   |    |   |    |   |   |   |   |  |  |    |   |    |                                                                                                                                                                                                                                                                                                                                                                                                                                                                                                                                                                                                                                                                                                                                                                                                                                                                                                                                                                                                                                                                                                                                                                                                                                                                                                                                                                                                                                                                                                                            |  |  |  |       |                           |                     |                                                   |            |                          |                     |                                    |       |                          |                    |                             |             |                             |                    |                                                 |     |                             |                    |                                                 |                 |                          |                    |                                                 |     |                             |      |                                                 |          |                             |                                                               |                                                 |                 |                             |                    |                                                 |
| A1                                                                                                                                                                                                                                                                                                                                | 0                           | 38                                                            | 2                                                 | 40 |              |  |    |  |  |  |  |   |   |  |    |   |    |   |    |   |   |   |   |  |  |    |   |    |                                                                                                                                                                                                                                                                                                                                                                                                                                                                                                                                                                                                                                                                                                                                                                                                                                                                                                                                                                                                                                                                                                                                                                                                                                                                                                                                                                                                                                                                                                                            |  |  |  |       |                           |                     |                                                   |            |                          |                     |                                    |       |                          |                    |                             |             |                             |                    |                                                 |     |                             |                    |                                                 |                 |                          |                    |                                                 |     |                             |      |                                                 |          |                             |                                                               |                                                 |                 |                             |                    |                                                 |
|                                                                                                                                                                                                                                                                                                                                   | 1                           | 0                                                             | 0                                                 | 0  |              |  |    |  |  |  |  |   |   |  |    |   |    |   |    |   |   |   |   |  |  |    |   |    |                                                                                                                                                                                                                                                                                                                                                                                                                                                                                                                                                                                                                                                                                                                                                                                                                                                                                                                                                                                                                                                                                                                                                                                                                                                                                                                                                                                                                                                                                                                            |  |  |  |       |                           |                     |                                                   |            |                          |                     |                                    |       |                          |                    |                             |             |                             |                    |                                                 |     |                             |                    |                                                 |                 |                          |                    |                                                 |     |                             |      |                                                 |          |                             |                                                               |                                                 |                 |                             |                    |                                                 |
|                                                                                                                                                                                                                                                                                                                                   |                             | 38                                                            | 2                                                 | 40 |              |  |    |  |  |  |  |   |   |  |    |   |    |   |    |   |   |   |   |  |  |    |   |    |                                                                                                                                                                                                                                                                                                                                                                                                                                                                                                                                                                                                                                                                                                                                                                                                                                                                                                                                                                                                                                                                                                                                                                                                                                                                                                                                                                                                                                                                                                                            |  |  |  |       |                           |                     |                                                   |            |                          |                     |                                    |       |                          |                    |                             |             |                             |                    |                                                 |     |                             |                    |                                                 |                 |                          |                    |                                                 |     |                             |      |                                                 |          |                             |                                                               |                                                 |                 |                             |                    |                                                 |
| $\pi$                                                                                                                                                                                                                                                                                                                             | -0.02<br>(with paradoxes)   | -1.43; 1.38<br>[19]                                           | BM: N.C.<br>EBM: -0.07; 1.00 (0.10)               |    |              |  |    |  |  |  |  |   |   |  |    |   |    |   |    |   |   |   |   |  |  |    |   |    |                                                                                                                                                                                                                                                                                                                                                                                                                                                                                                                                                                                                                                                                                                                                                                                                                                                                                                                                                                                                                                                                                                                                                                                                                                                                                                                                                                                                                                                                                                                            |  |  |  |       |                           |                     |                                                   |            |                          |                     |                                    |       |                          |                    |                             |             |                             |                    |                                                 |     |                             |                    |                                                 |                 |                          |                    |                                                 |     |                             |      |                                                 |          |                             |                                                               |                                                 |                 |                             |                    |                                                 |
| $k_\alpha$                                                                                                                                                                                                                                                                                                                        | 0.00<br>(with paradoxes)    | -1.35; 1.35<br>[62]                                           | BM: N.C.<br>EBM: 0.00; 1.00 (0.13)                |    |              |  |    |  |  |  |  |   |   |  |    |   |    |   |    |   |   |   |   |  |  |    |   |    |                                                                                                                                                                                                                                                                                                                                                                                                                                                                                                                                                                                                                                                                                                                                                                                                                                                                                                                                                                                                                                                                                                                                                                                                                                                                                                                                                                                                                                                                                                                            |  |  |  |       |                           |                     |                                                   |            |                          |                     |                                    |       |                          |                    |                             |             |                             |                    |                                                 |     |                             |                    |                                                 |                 |                          |                    |                                                 |     |                             |      |                                                 |          |                             |                                                               |                                                 |                 |                             |                    |                                                 |
| $k_C$                                                                                                                                                                                                                                                                                                                             | 0.00<br>(with paradoxes)    | N.C.                                                          | BM: N.C.<br>EBM: N.C.                             |    |              |  |    |  |  |  |  |   |   |  |    |   |    |   |    |   |   |   |   |  |  |    |   |    |                                                                                                                                                                                                                                                                                                                                                                                                                                                                                                                                                                                                                                                                                                                                                                                                                                                                                                                                                                                                                                                                                                                                                                                                                                                                                                                                                                                                                                                                                                                            |  |  |  |       |                           |                     |                                                   |            |                          |                     |                                    |       |                          |                    |                             |             |                             |                    |                                                 |     |                             |                    |                                                 |                 |                          |                    |                                                 |     |                             |      |                                                 |          |                             |                                                               |                                                 |                 |                             |                    |                                                 |
| $k_{PABAK}$                                                                                                                                                                                                                                                                                                                       | 0.90<br>(without paradoxes) | 0.76; 1.00<br>[19]                                            | BM: 0.74; 1.00 (0.90)<br>EBM: 0.75; 1.00 (0.90)   |    |              |  |    |  |  |  |  |   |   |  |    |   |    |   |    |   |   |   |   |  |  |    |   |    |                                                                                                                                                                                                                                                                                                                                                                                                                                                                                                                                                                                                                                                                                                                                                                                                                                                                                                                                                                                                                                                                                                                                                                                                                                                                                                                                                                                                                                                                                                                            |  |  |  |       |                           |                     |                                                   |            |                          |                     |                                    |       |                          |                    |                             |             |                             |                    |                                                 |     |                             |                    |                                                 |                 |                          |                    |                                                 |     |                             |      |                                                 |          |                             |                                                               |                                                 |                 |                             |                    |                                                 |
| $H$                                                                                                                                                                                                                                                                                                                               | 0.95<br>(without paradoxes) | 0.88; 1.00<br>[19]                                            | BM: 0.86; 1.00 (0.95)<br>EBM: 0.87; 1.00 (0.95)   |    |              |  |    |  |  |  |  |   |   |  |    |   |    |   |    |   |   |   |   |  |  |    |   |    |                                                                                                                                                                                                                                                                                                                                                                                                                                                                                                                                                                                                                                                                                                                                                                                                                                                                                                                                                                                                                                                                                                                                                                                                                                                                                                                                                                                                                                                                                                                            |  |  |  |       |                           |                     |                                                   |            |                          |                     |                                    |       |                          |                    |                             |             |                             |                    |                                                 |     |                             |                    |                                                 |                 |                          |                    |                                                 |     |                             |      |                                                 |          |                             |                                                               |                                                 |                 |                             |                    |                                                 |
| $\Gamma$<br>$J$                                                                                                                                                                                                                                                                                                                   | 0.81<br>(with paradoxes)    | 0.74; 0.88<br>[59]                                            | BM: 0.51; 1.00 (0.79)<br>EBM: 0.56; 1.00 (0.81)   |    |              |  |    |  |  |  |  |   |   |  |    |   |    |   |    |   |   |   |   |  |  |    |   |    |                                                                                                                                                                                                                                                                                                                                                                                                                                                                                                                                                                                                                                                                                                                                                                                                                                                                                                                                                                                                                                                                                                                                                                                                                                                                                                                                                                                                                                                                                                                            |  |  |  |       |                           |                     |                                                   |            |                          |                     |                                    |       |                          |                    |                             |             |                             |                    |                                                 |     |                             |                    |                                                 |                 |                          |                    |                                                 |     |                             |      |                                                 |          |                             |                                                               |                                                 |                 |                             |                    |                                                 |
| $B$                                                                                                                                                                                                                                                                                                                               | 0.95<br>(without paradoxes) | N.C.                                                          | BM: 0.87; 1.00 (0.95)<br>EBM: 0.87; 1.00 (0.95)   |    |              |  |    |  |  |  |  |   |   |  |    |   |    |   |    |   |   |   |   |  |  |    |   |    |                                                                                                                                                                                                                                                                                                                                                                                                                                                                                                                                                                                                                                                                                                                                                                                                                                                                                                                                                                                                                                                                                                                                                                                                                                                                                                                                                                                                                                                                                                                            |  |  |  |       |                           |                     |                                                   |            |                          |                     |                                    |       |                          |                    |                             |             |                             |                    |                                                 |     |                             |                    |                                                 |                 |                          |                    |                                                 |     |                             |      |                                                 |          |                             |                                                               |                                                 |                 |                             |                    |                                                 |
| $\Delta$                                                                                                                                                                                                                                                                                                                          | 0.95<br>(without paradoxes) | N.C.                                                          | BM: 0.90; 1.00 (0.97)<br>EBM: 0.87; 1.00 (0.95)   |    |              |  |    |  |  |  |  |   |   |  |    |   |    |   |    |   |   |   |   |  |  |    |   |    |                                                                                                                                                                                                                                                                                                                                                                                                                                                                                                                                                                                                                                                                                                                                                                                                                                                                                                                                                                                                                                                                                                                                                                                                                                                                                                                                                                                                                                                                                                                            |  |  |  |       |                           |                     |                                                   |            |                          |                     |                                    |       |                          |                    |                             |             |                             |                    |                                                 |     |                             |                    |                                                 |                 |                          |                    |                                                 |     |                             |      |                                                 |          |                             |                                                               |                                                 |                 |                             |                    |                                                 |
| $\gamma (AC_1)$                                                                                                                                                                                                                                                                                                                   | 0.95<br>(without paradoxes) | 0.83; 1.00<br>[21]                                            | BM: 0.81; 1.00 (0.94)<br>EBM: 0.86; 1.00 (0.95)   |    |              |  |    |  |  |  |  |   |   |  |    |   |    |   |    |   |   |   |   |  |  |    |   |    |                                                                                                                                                                                                                                                                                                                                                                                                                                                                                                                                                                                                                                                                                                                                                                                                                                                                                                                                                                                                                                                                                                                                                                                                                                                                                                                                                                                                                                                                                                                            |  |  |  |       |                           |                     |                                                   |            |                          |                     |                                    |       |                          |                    |                             |             |                             |                    |                                                 |     |                             |                    |                                                 |                 |                          |                    |                                                 |     |                             |      |                                                 |          |                             |                                                               |                                                 |                 |                             |                    |                                                 |
| <p>Agreement table</p>  <p>Observer agreement chart</p>                                                                                                                                                                                        |                             |                                                               |                                                   |    |              |  |    |  |  |  |  |   |   |  |    |   |    |   |    |   |   |   |   |  |  |    |   |    |                                                                                                                                                                                                                                                                                                                                                                                                                                                                                                                                                                                                                                                                                                                                                                                                                                                                                                                                                                                                                                                                                                                                                                                                                                                                                                                                                                                                                                                                                                                            |  |  |  |       |                           |                     |                                                   |            |                          |                     |                                    |       |                          |                    |                             |             |                             |                    |                                                 |     |                             |                    |                                                 |                 |                          |                    |                                                 |     |                             |      |                                                 |          |                             |                                                               |                                                 |                 |                             |                    |                                                 |

|                                                                                                                                                                                                                                                                                                                                   |   |    |   |    |                 |                             |                                                               |                                                 |  |  |  |   |   |  |    |   |    |   |    |   |   |   |   |  |  |    |   |    |  |  |  |  |
|-----------------------------------------------------------------------------------------------------------------------------------------------------------------------------------------------------------------------------------------------------------------------------------------------------------------------------------|---|----|---|----|-----------------|-----------------------------|---------------------------------------------------------------|-------------------------------------------------|--|--|--|---|---|--|----|---|----|---|----|---|---|---|---|--|--|----|---|----|--|--|--|--|
| I-IT6                                                                                                                                                                                                                                                                                                                             |   |    |   |    | $P_o = 0.97$    |                             |                                                               |                                                 |  |  |  |   |   |  |    |   |    |   |    |   |   |   |   |  |  |    |   |    |  |  |  |  |
| <table><tr><td colspan="2"></td><td colspan="2">A2</td><td></td></tr><tr><td colspan="2"></td><td>0</td><td>1</td><td></td></tr><tr><td rowspan="2">A1</td><td>0</td><td>27</td><td>1</td><td>28</td></tr><tr><td>1</td><td>0</td><td>2</td><td>2</td></tr><tr><td colspan="2"></td><td>27</td><td>3</td><td>30</td></tr></table> |   |    |   |    |                 |                             | A2                                                            |                                                 |  |  |  | 0 | 1 |  | A1 | 0 | 27 | 1 | 28 | 1 | 0 | 2 | 2 |  |  | 27 | 3 | 30 |  |  |  |  |
|                                                                                                                                                                                                                                                                                                                                   |   | A2 |   |    |                 |                             |                                                               |                                                 |  |  |  |   |   |  |    |   |    |   |    |   |   |   |   |  |  |    |   |    |  |  |  |  |
|                                                                                                                                                                                                                                                                                                                                   |   | 0  | 1 |    |                 |                             |                                                               |                                                 |  |  |  |   |   |  |    |   |    |   |    |   |   |   |   |  |  |    |   |    |  |  |  |  |
| A1                                                                                                                                                                                                                                                                                                                                | 0 | 27 | 1 | 28 |                 |                             |                                                               |                                                 |  |  |  |   |   |  |    |   |    |   |    |   |   |   |   |  |  |    |   |    |  |  |  |  |
|                                                                                                                                                                                                                                                                                                                                   | 1 | 0  | 2 | 2  |                 |                             |                                                               |                                                 |  |  |  |   |   |  |    |   |    |   |    |   |   |   |   |  |  |    |   |    |  |  |  |  |
|                                                                                                                                                                                                                                                                                                                                   |   | 27 | 3 | 30 |                 |                             |                                                               |                                                 |  |  |  |   |   |  |    |   |    |   |    |   |   |   |   |  |  |    |   |    |  |  |  |  |
| Agreement table                                                                                                                                                                                                                                                                                                                   |   |    |   |    |                 |                             |                                                               |                                                 |  |  |  |   |   |  |    |   |    |   |    |   |   |   |   |  |  |    |   |    |  |  |  |  |
| 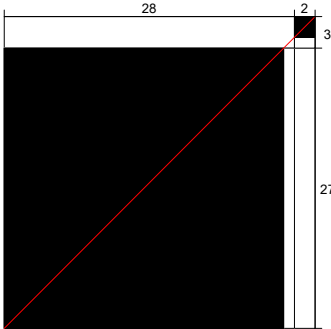                                                                                                                                                                                                                                                 |   |    |   |    |                 |                             |                                                               |                                                 |  |  |  |   |   |  |    |   |    |   |    |   |   |   |   |  |  |    |   |    |  |  |  |  |
| Observer agreement chart                                                                                                                                                                                                                                                                                                          |   |    |   |    |                 |                             |                                                               |                                                 |  |  |  |   |   |  |    |   |    |   |    |   |   |   |   |  |  |    |   |    |  |  |  |  |
|                                                                                                                                                                                                                                                                                                                                   |   |    |   |    | $\pi$           | 0.78<br>(with paradoxes)    | 0.35; 1.20<br>[19]                                            | BM: 0.62; 0.94 (0.77)<br>EBM: 0.47; 0.80 (0.74) |  |  |  |   |   |  |    |   |    |   |    |   |   |   |   |  |  |    |   |    |  |  |  |  |
|                                                                                                                                                                                                                                                                                                                                   |   |    |   |    | $k$<br>$\alpha$ | 0.78<br>(with paradoxes)    | 0.36; 1.20<br>[62]                                            | BM: 0.00; 1.00 (0.77)<br>EBM: 0.00; 1.00 (0.74) |  |  |  |   |   |  |    |   |    |   |    |   |   |   |   |  |  |    |   |    |  |  |  |  |
|                                                                                                                                                                                                                                                                                                                                   |   |    |   |    | $k_C$           | 1.00<br>(with paradoxes)    | 0.58; 1.41<br>[62]                                            | BM: N.C.<br>EBM: N.C.                           |  |  |  |   |   |  |    |   |    |   |    |   |   |   |   |  |  |    |   |    |  |  |  |  |
|                                                                                                                                                                                                                                                                                                                                   |   |    |   |    | $k_{PABAK}$     | 0.93<br>(without paradoxes) | 0.82; 1.00<br>[19]                                            | BM: 0.74; 1.00 (0.93)<br>EBM: 0.80; 1.00 (0.93) |  |  |  |   |   |  |    |   |    |   |    |   |   |   |   |  |  |    |   |    |  |  |  |  |
|                                                                                                                                                                                                                                                                                                                                   |   |    |   |    | $H$             | 0.97<br>(without paradoxes) | 0.91; 1.00<br>[19]                                            | BM: 0.79; 0.99 (0.90)<br>EBM: 0.9; 1.00 (0.97)  |  |  |  |   |   |  |    |   |    |   |    |   |   |   |   |  |  |    |   |    |  |  |  |  |
|                                                                                                                                                                                                                                                                                                                                   |   |    |   |    | $\Gamma$<br>$J$ | 0.87<br>(with paradoxes)    | 0.78; 0.95<br>[59]                                            | BM: 0.55; 1.00 (0.87)<br>EBM: 0.64; 1.00 (0.87) |  |  |  |   |   |  |    |   |    |   |    |   |   |   |   |  |  |    |   |    |  |  |  |  |
|                                                                                                                                                                                                                                                                                                                                   |   |    |   |    | $B$             | 0.96<br>(without paradoxes) | N.C.                                                          | BM: 0.88; 1.00 (0.96)<br>EBM: 0.88; 1.00 (0.96) |  |  |  |   |   |  |    |   |    |   |    |   |   |   |   |  |  |    |   |    |  |  |  |  |
|                                                                                                                                                                                                                                                                                                                                   |   |    |   |    | $\Delta$        | 0.97<br>(without paradoxes) | $\Delta_I = 0.87; 1.00$<br>$\Delta_{II} = 0.87; 1.00$<br>[24] | BM: 0.87; 1.00 (0.97)<br>EBM: 0.90; 1.00 (0.97) |  |  |  |   |   |  |    |   |    |   |    |   |   |   |   |  |  |    |   |    |  |  |  |  |
|                                                                                                                                                                                                                                                                                                                                   |   |    |   |    | $\gamma (AC_1)$ | 0.96<br>(without paradoxes) | 0.84; 1.00<br>[21]                                            | BM: 0.84; 1.00 (0.96)<br>EBM: 0.80; 1.00 (0.93) |  |  |  |   |   |  |    |   |    |   |    |   |   |   |   |  |  |    |   |    |  |  |  |  |

|                                                                                                                                                                                                                                                                                                                                   |   |    |   |    |                 |                             |                                                                |                                                 |  |  |  |   |   |  |    |   |    |   |    |   |   |   |   |  |  |    |   |    |  |  |  |  |
|-----------------------------------------------------------------------------------------------------------------------------------------------------------------------------------------------------------------------------------------------------------------------------------------------------------------------------------|---|----|---|----|-----------------|-----------------------------|----------------------------------------------------------------|-------------------------------------------------|--|--|--|---|---|--|----|---|----|---|----|---|---|---|---|--|--|----|---|----|--|--|--|--|
| I-IT7                                                                                                                                                                                                                                                                                                                             |   |    |   |    | $P_o = 0.97$    |                             |                                                                |                                                 |  |  |  |   |   |  |    |   |    |   |    |   |   |   |   |  |  |    |   |    |  |  |  |  |
| <table><tr><td colspan="2"></td><td colspan="2">A2</td><td></td></tr><tr><td colspan="2"></td><td>0</td><td>1</td><td></td></tr><tr><td rowspan="2">A1</td><td>0</td><td>29</td><td>1</td><td>30</td></tr><tr><td>1</td><td>0</td><td>0</td><td>0</td></tr><tr><td colspan="2"></td><td>29</td><td>1</td><td>30</td></tr></table> |   |    |   |    |                 |                             | A2                                                             |                                                 |  |  |  | 0 | 1 |  | A1 | 0 | 29 | 1 | 30 | 1 | 0 | 0 | 0 |  |  | 29 | 1 | 30 |  |  |  |  |
|                                                                                                                                                                                                                                                                                                                                   |   | A2 |   |    |                 |                             |                                                                |                                                 |  |  |  |   |   |  |    |   |    |   |    |   |   |   |   |  |  |    |   |    |  |  |  |  |
|                                                                                                                                                                                                                                                                                                                                   |   | 0  | 1 |    |                 |                             |                                                                |                                                 |  |  |  |   |   |  |    |   |    |   |    |   |   |   |   |  |  |    |   |    |  |  |  |  |
| A1                                                                                                                                                                                                                                                                                                                                | 0 | 29 | 1 | 30 |                 |                             |                                                                |                                                 |  |  |  |   |   |  |    |   |    |   |    |   |   |   |   |  |  |    |   |    |  |  |  |  |
|                                                                                                                                                                                                                                                                                                                                   | 1 | 0  | 0 | 0  |                 |                             |                                                                |                                                 |  |  |  |   |   |  |    |   |    |   |    |   |   |   |   |  |  |    |   |    |  |  |  |  |
|                                                                                                                                                                                                                                                                                                                                   |   | 29 | 1 | 30 |                 |                             |                                                                |                                                 |  |  |  |   |   |  |    |   |    |   |    |   |   |   |   |  |  |    |   |    |  |  |  |  |
| Agreement table                                                                                                                                                                                                                                                                                                                   |   |    |   |    |                 |                             |                                                                |                                                 |  |  |  |   |   |  |    |   |    |   |    |   |   |   |   |  |  |    |   |    |  |  |  |  |
|                                                                                                                                                                                                                                                |   |    |   |    |                 |                             |                                                                |                                                 |  |  |  |   |   |  |    |   |    |   |    |   |   |   |   |  |  |    |   |    |  |  |  |  |
| Observer agreement chart                                                                                                                                                                                                                                                                                                          |   |    |   |    |                 |                             |                                                                |                                                 |  |  |  |   |   |  |    |   |    |   |    |   |   |   |   |  |  |    |   |    |  |  |  |  |
|                                                                                                                                                                                                                                                                                                                                   |   |    |   |    | $\pi$           | -0.02<br>(with paradoxes)   | -2.01; 1.98<br>[19]                                            | BM: N.C.<br>EBM: -0.05; 1.00 (0.35)             |  |  |  |   |   |  |    |   |    |   |    |   |   |   |   |  |  |    |   |    |  |  |  |  |
|                                                                                                                                                                                                                                                                                                                                   |   |    |   |    | $k$<br>$\alpha$ | 0.00<br>(with paradoxes)    | -1.93; 1.93<br>[62]                                            | BM: N.C.<br>EBM: 0.00; 1.00 (0.36)              |  |  |  |   |   |  |    |   |    |   |    |   |   |   |   |  |  |    |   |    |  |  |  |  |
|                                                                                                                                                                                                                                                                                                                                   |   |    |   |    | $k_C$           | 0.00<br>(with paradoxes)    | N.C.                                                           | BM: N.C.<br>EBM: 0.00; 1.00 (0.00)              |  |  |  |   |   |  |    |   |    |   |    |   |   |   |   |  |  |    |   |    |  |  |  |  |
|                                                                                                                                                                                                                                                                                                                                   |   |    |   |    | $k_{PABAK}$     | 0.93<br>(without paradoxes) | 0.82; 1.00<br>[19]                                             | BM: 0.77; 1.00 (0.93)<br>EBM: 0.80; 1.00 (0.93) |  |  |  |   |   |  |    |   |    |   |    |   |   |   |   |  |  |    |   |    |  |  |  |  |
|                                                                                                                                                                                                                                                                                                                                   |   |    |   |    | $H$             | 0.97<br>(without paradoxes) | 0.91; 1.00<br>[19]                                             | BM: 0.90; 1.00 (0.97)<br>EBM: 0.90; 1.00 (0.97) |  |  |  |   |   |  |    |   |    |   |    |   |   |   |   |  |  |    |   |    |  |  |  |  |
|                                                                                                                                                                                                                                                                                                                                   |   |    |   |    | $\Gamma$<br>$J$ | 0.87<br>(with paradoxes)    | 0.78; 0.96<br>[59]                                             | BM: 0.63; 1.00 (0.88)<br>EBM: 0.64; 1.00 (0.87) |  |  |  |   |   |  |    |   |    |   |    |   |   |   |   |  |  |    |   |    |  |  |  |  |
|                                                                                                                                                                                                                                                                                                                                   |   |    |   |    | $B$             | 0.97<br>(without paradoxes) | N.C.                                                           | BM: 0.91; 1.00 (0.97)<br>EBM: 0.90; 1.00 (0.97) |  |  |  |   |   |  |    |   |    |   |    |   |   |   |   |  |  |    |   |    |  |  |  |  |
|                                                                                                                                                                                                                                                                                                                                   |   |    |   |    | $\Delta$        | 0.97<br>(without paradoxes) | $\Delta_I = 0.87; 1.00$<br>$\Delta_{II} = \text{N.C.}$<br>[24] | BM: 0.88; 1.00 (0.97)<br>EBM: 0.90; 1.00 (0.97) |  |  |  |   |   |  |    |   |    |   |    |   |   |   |   |  |  |    |   |    |  |  |  |  |
|                                                                                                                                                                                                                                                                                                                                   |   |    |   |    | $\gamma (AC_1)$ | 0.96<br>(without paradoxes) | 0.85; 1.00<br>[21]                                             | BM: 0.88; 1.00 (0.97)<br>EBM: 0.89; 1.00 (0.96) |  |  |  |   |   |  |    |   |    |   |    |   |   |   |   |  |  |    |   |    |  |  |  |  |

I-PT1

|    |   |    |   |    |
|----|---|----|---|----|
|    |   | 2  |   |    |
|    |   | 0  | 1 |    |
| A1 | 0 | 40 | 0 | 40 |
|    | 1 | 0  | 6 | 6  |
|    |   | 40 | 6 | 46 |

Agreement table

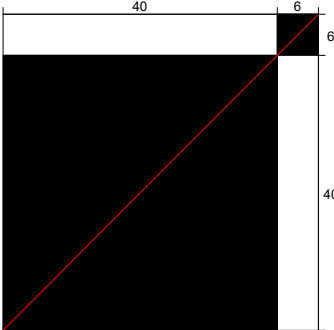

Observer agreement chart

$P_o = 1.00$

|                 |                             |                                                   |                                                 |
|-----------------|-----------------------------|---------------------------------------------------|-------------------------------------------------|
| $\pi$           | 1.00<br>(with paradoxes)    | 1.00; 1.00<br>[19]                                | BM: 1.00; 1.00 (1.00)<br>EBM: 1.00; 1.00 (1.00) |
| $k_\alpha$      | 1.00<br>(with paradoxes)    | 1.00; 1.00<br>[62]                                | BM: 1.00; 1.00 (1.00)<br>EBM: 1.00; 1.00 (1.00) |
| $k_C$           | 1.00<br>(with paradoxes)    | -1.00; 1.00<br>[62]                               | BM: 1.00; 1.00 (1.00)<br>EBM: 1.00; 1.00 (1.00) |
| $k_{PABAK}$     | 1.00<br>(without paradoxes) | N.C.                                              | BM: 1.00; 1.00 (1.00)<br>EBM: 1.00; 1.00 (1.00) |
| $H$             | 1.00<br>(without paradoxes) | N.C.                                              | BM: 1.00; 1.00 (1.00)<br>EBM: 1.00; 1.00 (1.00) |
| $\Gamma$<br>$J$ | 1.00<br>(with paradoxes)    | 0.94; 1.00<br>[59]                                | BM: 1.00; 1.00 (1.00)<br>EBM: 1.00; 1.00 (1.00) |
| $B$             | 1.00<br>(without paradoxes) | N.C.                                              | BM: 1.00; 1.00 (1.00)<br>EBM: 1.00; 1.00 (1.00) |
| $\Delta$        | 1.00<br>(without paradoxes) | $\Delta_I = 1.00$<br>$\Delta_{II} = 1.00$<br>[24] | BM: 1.00; 1.00 (1.00)<br>EBM: 1.00; 1.00 (1.00) |
| $\gamma (AC_1)$ | 1.00<br>(without paradoxes) | 0.88; 1.12<br>[21]                                | BM: 1.00; 1.00 (1.00)<br>EBM: 1.00; 1.00 (1.00) |

## References

63. Agresti, A. *Categorical Data Analysis*, 2nd ed.; Wiley: New York, NY, USA, 2002; pp. 1–356.

**Table S2.** Agreement table.

Observations can be organized in a contingency 2 (rater)  $\times$  2 (categories) table, in which the  $N$  objects are evaluated by a categorical scale of 2 categories. This table is known as agreement table [63].

|                |   | Rater B<br>$q$ |          | Total    |
|----------------|---|----------------|----------|----------|
|                |   | 1              | 2        |          |
| Rater A<br>$q$ | 1 | $n_{11}$       | $n_{12}$ | $n_{1.}$ |
|                | 2 | $n_{21}$       | $n_{22}$ | $n_{2.}$ |
| Total          |   | $n_{.1}$       | $n_{.2}$ | $n$      |

$q$  = categories;  $n$  = subjects
